# Supplementary material for: Circulating tumor cells detection in tumor draining vein of breast cancer patients
Source: PubMed Central journal article supplement (PMC6890763; doi:10.1038/s41598-019-54839-y), 2019-12-03
Supplement: 41598_2019_54839_MOESM1_ESM.pdf [file 41598_2019_54839_MOESM1_ESM.pdf]

## **Supplementary information**

### **TITLE:**

**Circulating tumor cells detection in tumor draining vein of breast cancer patients**

### **AUTHORS:**

Masaya Hattori<sup>1</sup>, Hayao Nakanishi<sup>2, 3</sup>, Mayumi Yoshimura<sup>2</sup>, Madoka Iwase<sup>1</sup>, Akiyo Yoshimura<sup>1</sup>, Yayoi Adachi<sup>1</sup>, Naomi Gondo<sup>1</sup>, Haruru Kotani<sup>1</sup>, Masataka Sawaki<sup>1</sup>, Nao Fujita<sup>2</sup>, Yasushi Yatabe<sup>2</sup> and Hiroji Iwata<sup>1</sup>

### **AFFILIATIONS:**

<sup>1</sup> Department of Breast Oncology, Aichi Cancer Center, 1-1  
Kanokoden, Chikusa, Nagoya, 464-8681, Japan

<sup>2</sup> Department of Pathology and Molecular Diagnostics, Aichi Cancer Center, 1-1,  
Kanokoden, Chikusa, Nagoya 464-8681, Japan

<sup>3</sup> Laboratory of Pathology and Clinical Research, Aichi Cancer Center Aichi Hospital,  
18 Kuriyada Kakemachi, Okazaki, 444-0011, Japan

### **CORRESPONDING AUTHOR:**

Masaya Hattori, MD

1-1 Kanokoden, Chikusa, Nagoya, 464-8681, Japan

Phone: +81-52-762-6111

Fax: +81-52-764-2963

Email: [mhattori@aichi-cc.jp](mailto:mhattori@aichi-cc.jp)

**Supplementary Table 1.**

CTC numbers and survival outcome in 8 patients who achieved pathological complete response

| Patient No. | Age | ER and/or PR | HER2     | DB volume (ml) | CTC numbers in DB | CTC numbers in PB (/10ml) | Survival outcome |
|-------------|-----|--------------|----------|----------------|-------------------|---------------------------|------------------|
| 1           | 52  | Positive     | Positive | 2.0            | 0                 | 0                         | No recurrence    |
| 2           | 57  | Negative     | Positive | 1.0            | 11                | 0                         | No recurrence    |
| 3           | 36  | Positive     | Negative | 0.2            | 11                | 0                         | No recurrence    |
| 4           | 44  | Negative     | Negative | 0.2            | 0                 | 3                         | No recurrence    |
| 5           | 64  | Negative     | Positive | 0.6            | 6                 | 3                         | No recurrence    |
| 6           | 58  | Negative     | Positive | 0.2            | 32                | 8                         | No recurrence    |
| 7           | 48  | Positive     | Positive | 0.3            | 52                | 14                        | No recurrence    |
| 8           | 67  | Negative     | Negative | 3.0            | 19                | 23                        | No recurrence    |

Abbreviations: ER, estrogen receptor; PR, progesterone receptor; HER2, human epidermal growth factor-2; DB, draining vein blood; PB, peripheral blood, CTC circulating tumor cell.
